# Supplementary material
Source: PubMed Central journal article supplement (PMC5016167)
Supplement: 10.1074_M116.735258_jbc.M116.735258-1.pdf [file 10.1074_M116.735258_jbc.M116.735258-1.pdf]

SUPPLEMENTAL DATA

For

ASN347-GLYCOSYLATION OF CORTICOSTEROID BINDING GLOBULIN FINE-TUNES THE  
HOST IMMUNE RESPONSE BY MODULATING PROTEOLYSIS BY *P. AERUGINOSA* AND  
NEUTROPHIL ELASTASE\*

**Zeynep Sumer-Bayraktar<sup>1</sup>, Oliver C. Grant<sup>2</sup>, Vignesh Venkatakrisnan<sup>1</sup>, Robert J. Woods<sup>2</sup>, Nicolle  
H. Packer<sup>1</sup> and Morten Thaysen-Andersen<sup>1^</sup>**

<sup>1</sup>Dept. Chemistry and Biomolecular Sciences, Macquarie University, Sydney, NSW-2109, Australia.

<sup>2</sup>Complex Carbohydrate Research Center, 315 Riverbend Road, University of Georgia, Athens, 30602,  
Georgia, US.

\*Running title: *Asn347-glycans fine-tune elastase-based RCL cleavage of CBG*

<sup>^</sup>To whom correspondence should be addressed: Dr. Morten Thaysen-Andersen,  
Department of Chemistry and Biomolecular Sciences, Macquarie University, Sydney, NSW-2109,  
Australia, Tel: +61 2 9850 7487, Fax: +61 2 9850 6192, E-mail: morten.andersen@mq.edu.au

---

Supplementary Table S1.....Page S2

## SUPPLEMENTARY TABLES

**Supplementary Table S1:** Overview of the nomenclature and structure of *N*-glycans used for MD simulations of glycosylated CBG. The 3D structures of the glycans can be generated via GLYCAM-Web by copying the glycan structures into the carbohydrate builder on GLYCAM-Web or built via URL by preceding each structure with “<http://glycam.org/url?condensed=>”.

| Glyco-form | Glycan structure (Condensed GLYCAM nomenclature)                                                                                                             | Structure |
|------------|--------------------------------------------------------------------------------------------------------------------------------------------------------------|-----------|
| BS2        | DNeup5Aca2-3DGalpb1-4DGlcNac1-2DManpa1-6[DNeup5Aca2-3DGalpb1-4DGlcNac1-2DManpa1-3]DManpb1-4DGlcNac1-4DGlcNac1-OH                                             |           |
| TS3-A      | DNeup5Aca2-3DGalpb1-4DGlcNac1-2DManpa1-6[DNeup5Aca2-3DGalpb1-4DGlcNac1-2[DNeup5Aca2-3DGalpb1-4DGlcNac1-4]DManpa1-3]DManpb1-4DGlcNac1-4DGlcNac1-OH            |           |
| DTS3-A     | DGalpb1-4DGlcNac1-2DManpa1-6[DGalpb1-4DGlcNac1-2[DGalpb1-4DGlcNac1-4]DManpa1-3]DManpb1-4DGlcNac1-4DGlcNac1-OH                                                |           |
| TS3f-A     | DNeup5Aca2-3DGalpb1-4DGlcNac1-2DManpa1-6[DNeup5Aca2-3DGalpb1-4DGlcNac1-2[DNeup5Aca2-3DGalpb1-4DGlcNac1-4]DManpa1-3]DManpb1-4DGlcNac1-4[LFucpa1-6]DGlcNac1-OH |           |
| TS3-B      | DNeup5Aca2-3DGalpb1-4DGlcNac1-2[DNeup5Aca2-3DGalpb1-4DGlcNac1-6]DManpa1-6[DNeup5Aca2-3DGalpb1-4DGlcNac1-2DManpa1-3]DManpb1-4DGlcNac1-4DGlcNac1-OH            |           |
| DTS3-B     | DGalpb1-4DGlcNac1-2[DGalpb1-4DGlcNac1-6]DManpa1-6[DGalpb1-4DGlcNac1-2DManpa1-3]DManpb1-4DGlcNac1-4DGlcNac1-OH                                                |           |
| TS3f-B     | DNeup5Aca2-3DGalpb1-4DGlcNac1-2[DNeup5Aca2-3DGalpb1-4DGlcNac1-6]DManpa1-6[DNeup5Aca2-3DGalpb1-4DGlcNac1-2DManpa1-3]DManpb1-4DGlcNac1-4[LFucpa1-6]DGlcNac1-OH |           |
